# Supplementary material for: Genome-Wide Identification of SSR and SNP Markers Based on Whole-Genome Re-Sequencing of a Thailand Wild Sacred Lotus (Nelumbo nucifera)
Source: PLoS One. 2015 Nov 25;10(11):e0143765. doi: 10.1371/journal.pone.0143765 (PMC4659564; doi:10.1371/journal.pone.0143765)
Supplement: S7 Table — (XLSX) [file pone.0143765.s007.xlsx]

## Sheet: Sheet1
S7 Table. Frequency of classified repeat types of genomic simple sequence repeats (SSRs) (considering sequence complementary)
Repeats	5	6	7	8	9	10	11	12	13	14	15	16	17	18	19	20	21	22	23	24	25	26	27	28	29	30	31	32	33	34	35	36	37	38	39	40	41	42	43	44	45	46	47	48	49	50	51	52	53
A/T	-	-	-	-	-	51285	20605	11823	8005	6202	4891	3284	1808	936	524	320	244	181	130	78	62	48	44	33	25	20	16	9	12	13	10	10	8	4	5	12	6	3	1	4	3	4	2	3	2	2	1		1
C/G	-	-	-	-	-	1470	755	300	178	80	38	27	11	6	2	4	1	1	1				1
AC/GT	-	1986	1219	807	498	269	165	95	66	40	33	18	17	11	7	8	2	1	5	1	1		1	1		2	1								1
AG/CT	-	11173	8346	6219	4315	2798	1742	1332	1010	752	516	415	301	208	156	96	75	49	28	20	9	13	2		4		1	1		1					1
AT/AT	-	3191	1693	1065	609	288	122	43	15	7	1	1	1
CG/CG	-	14	8	2	2
AAC/GTT	668	255	88	35	25	8	11	9	5	2	2	1	2	1	1			2	1	1		1																				1
AAG/CTT	4613	2181	1040	594	460	329	301	212	167	140	72	75	59	20	25	11	8	12	8	4	3	4		2
AAT/ATT	2253	987	450	191	90	30	15	7	2	3	3	1
ACC/GGT	627	179	47	27	8	3				1	1
ACG/CGT	80	34	10	6	1
ACT/AGT	351	152	80	45	21	16	10	7	6	5	5	4	2	2		1
AGC/CTG	315	84	17	8	1	2
AGG/CCT	649	280	105	63	21	11	8	4	2	1
ATC/ATG	2023	757	280	156	67	28	22	11	10	6	5	3	2				2
CCG/CGG	18	2		3	1
AAAC/GTTT	56	13	1	1	1
AAAG/CTTT	382	108	39	18	9	2	5	3		1		1
AAAT/ATTT	632	80	21	3	1
AACC/GGTT	4	2
AACG/CGTT		1	1
AACT/AGTT	4	1
AAGC/CTTG	1	2	1
AAGG/CCTT	16	6	2	1	1
AATC/ATTG	24	5	1			1
AATG/ATTC	32	11	2	2
AATT/AATT	74	14	1		1
ACAG/CTGT	17	7	1
ACAT/ATGT	285	162	84	52	31	23	24	21	24	8	22	15	10	16	13	11	13	7	3	2	2	2	1	1	1	1	1	1	1	1									2					1				1
ACCG/CGGT	1
ACCT/AGGT	6			1
ACGC/CGTG	2
ACGT/ACGT	3
ACTC/AGTG	19	4	2	2		2	1
ACTG/AGTC	3
AGAT/ATCT	207	109	72	39	25	16	17	10	15	3	2	2		2
AGCC/CTGG	4	2
AGCG/CGCT	13	2
AGCT/AGCT	10	1	1
AGGC/CCTG		1
AGGG/CCCT	43	11	5
ATCC/ATGG	13	8	1	1		1
ATCG/ATCG	3
ATGC/ATGC	8	2
AAAAC/GTTTT	18
AAAAG/CTTTT	62	17	5	2	1			1
AAAAT/ATTTT	48	6	2
AAACC/GGTTT	5
AAAGC/CTTTG	2
AAAGG/CCTTT	43	8	5	2	2	2
AAATC/ATTTG	2
AAATG/ATTTC	3
AACAC/GTGTT	3
AACAG/CTGTT	1	1
AACAT/ATGTT	20
AACCC/GGGTT	31	4			1
AACCG/CGGTT	1
AACGT/ACGTT	1
AACTC/AGTTG	3
AACTG/AGTTC	2
AAGAC/CTTGT	1
AAGAG/CTCTT	128	27	11	10		3	1		1
AAGAT/ATCTT	21	4	1	3
AAGCC/CTTGG	1	1	1
AAGGG/CCCTT	3	1
AAGTC/ACTTG	1
AATAC/ATTGT	4	1
AATAG/ATTCT	3
AATAT/ATATT	4
AATCC/ATTGG	6
AATCT/AGATT	1
ACACC/GGTGT	1
ACACG/CGTGT	1
ACAGC/CTGTG	1
ACATC/ATGTG	1
ACCAG/CTGGT	7			2
ACCCC/GGGGT	1
ACCGG/CCGGT	1
ACCTG/AGGTC	1
ACGGC/CCGTG	1
ACTAG/AGTCT	1
ACTCC/AGTGG	2
ACTGG/AGTCC	1
AGAGG/CCTCT	14	6	3
AGATC/ATCTG	1
AGATG/ATCTC	3
AGCAT/ATGCT	1
AGCCC/CTGGG	4
AGCCG/CGGCT	2
AGCCT/AGGCT	3
AGCTC/AGCTG	1
AGGAT/ATCCT				1
AGGCG/CCTCG		1
AGGGG/CCCCT	1
ATATC/ATATG	2	1
ATCCC/ATGGG	13	3		1
ATCCG/ATCGG	1
CCCCG/CGGGG	1
CCCGG/CCGGG	1
AAAAAC/GTTTTT	4	1
AAAAAG/CTTTTT	16	2	1
AAAAAT/ATTTTT	5
AAAAGC/CTTTTG		1
AAAAGG/CCTTTT	3	2	1
AAACAT/ATGTTT		1
AAACCC/GGGTTT	1
AAAGAC/CTTTGT	1
AAAGAG/CTCTTT	4	1	1	1			1		1														1
AAAGCC/CTTTGG	1
AAAGGG/CCCTTT	2
AAAGTT/AACTTT				1
AAATAC/ATTTGT	1
AAATAT/ATATTT	1
AAATGT/ACATTT	1
AAATTC/AATTTG	15	1	1
AACAAG/CTTGTT	2	1				1
AACAAT/ATTGTT	1	2	2				1
AACACC/GGTGTT	1
AACAGC/CTGTTG		1		1
AACCAC/GGTTGT	1
AACCAG/CTGGTT	1
AACCCC/GGGGTT	1
AACCCT/AGGGTT		2
AACGCC/CGTTGG	1
AACGGC/CCGTTG	1
AACTAT/AGTTAT	1
AACTGT/ACAGTT				1
AAGAAT/ATTCTT			1	1
AAGAGG/CCTCTT	2	2			1
AAGATC/ATCTTG	2	1
AAGCAC/CTTGTG	1
AAGCCC/CTTGGG	1		1
AAGCTC/AGCTTG	3
AAGGAG/CCTTCT	1
AAGGGC/CCCTTG	1		1
AAGTAC/ACTTGT	1
AAGTGG/ACTTCC			1
AATACT/AGTATT	2
AATAGT/ACTATT	2	1	1
AATCAT/ATGATT		1
AATCCC/ATTGGG	1
AATCGG/ATTCCG	1
AATGAG/ATTCTC	1
AATGGG/ATTCCC		1			1
AATGGT/ACCATT	1
AATTAC/AATTGT	1
AATTCC/AATTGG	4
ACACAG/CTGTGT	2						1
ACACAT/ATGTGT		1		1
ACACCC/GGGTGT	1
ACAGAG/CTCTGT	2	1	1
ACAGCC/CTGTGG	1	1
ACAGGC/CCTGTG					1
ACAGGG/CCCTGT	1
ACATAG/ATGTCT				1
ACATAT/ATATGT	5	4	2		1	1	1	1	1	1		1
ACATCC/ATGTGG			1
ACATCG/ATGTCG		1
ACATGC/ATGTGC	1
ACATGG/ATGTCC	1
ACCACG/CGTGGT	1
ACCATC/ATGGTG	3	1
ACCCAT/ATGGGT	1
ACCCTG/AGGGTC	1
ACCGAG/CGGTCT	1
ACCTCC/AGGTGG	1		1
ACCTCT/AGAGGT	1
ACGGAG/CCGTCT	1
ACGGAT/ATCCGT	1	1
ACTCCC/AGTGGG	2
ACTCTC/AGAGTG	3
ACTGCG/AGTCGC	2
ACTGCT/AGCAGT	1
ACTGGC/AGTGCC	2
AGAGAT/ATCTCT	2
AGAGCT/AGCTCT	1
AGAGGC/CCTCTG	1
AGAGGG/CCCTCT	4	3	1
AGATAT/ATATCT	5	1								1
AGATCC/ATCTGG	1
AGATGC/ATCTGC	1
AGATGG/ATCTCC			1
AGCATC/ATGCTG								1
AGCCCG/CGGGCT	1
AGCTCC/AGCTGG	1
AGGCCC/CCTGGG	2
AGGGCG/CCCTCG	1
ATCCCC/ATGGGG	1
ATGCCC/ATGGGC	2	1	1
[truncated: 35 more columns]
